# Supplementary material for: Does size matter? Morphological and genetic similarities between cashew (Anacardium occidentale) and cajuí (A. humile)
Source: Research Square preprint supplement (doi:10.21203/rs.3.rs-8758033/v1), 2026-02-12
Supplement: Supplementary file 1 [file 3d8faddb4904419312596a20.docx]

Does size matter? Morphological and genetic similarities between cashew (*Anacardium occidentale*) and *cajuí* (*A. humile*)

Journal Name: [Plant Biosystems](https://link.springer.com/journal/44473)

Acalene Gonçalveis-Oliveira¹, Thiago Nascimento¹, Priscila Alves Barroso², Cíntia Luíza da Silva Luz³, Silvokleio da Costa Silva⁴, Andrea Pedrosa-Harand¹*

¹Laboratory of Plant Cytogenetics and Evolution, Department of Botany, Biosciences Centre, Federal University of Pernambuco. Recife, PE, 50.670-901, Brazil.

²Laboratory of Breeding and Data Analysis, Professor Cinobelina Elvas Campus, Federal University of Piauí. Bom Jesus, PI, 64.900-000, Brazil.

³Laboratory of Plant Taxonomy, Department of Plant Biology, Institute of Biology, State University of Campinas, Campinas, Brazil.

⁴Laboratory of Genetics and Germplasm Conservation, Professora Cinobelina Elvas Campus, Federal University of Piauí. Bom Jesus, PI, 64.900-000, Brazil.

*Corresponding author. Email: [andrea.harand@ufpe.br](mailto:andrea.harand@ufpe.br)

ORCIDs:

Acalene Gonçalveis-Oliveira <https://orcid.org/0000-0001-6720-3134>

Thiago Nascimento <https://orcid.org/0000-0002-7742-0260>

Priscila Alves Barroso <https://orcid.org/0000-0003-1749-1961>

Cíntia Luíza da Silva Luz https://orcid.org/0000-0002-7144-5109

Silvokleio da Costa Silva https://orcid.org/0000-0002-9975-1212

Andrea Pedrosa-Harand https://orcid.org/0000-0001-5213-4770

**Supplementary Material** **– Tables**

**Table S1** *Anacardium* accessions analyzed from the Active Germplasm Bank of the Professor Cinobelina Elvas Campus, Federal University of Piauí, in Bom Jesus-PI (AN: *A. humile* or *A. occidentale*), and provided by Embrapa Tropical Agroindustry (CNPAT), Fortaleza-CE (BRS: *A. occidentale*; and BGC: *A. occidentale*, previously identified as *A. othonianum*). BRS 226 is a cultivar, and clones from this accession planted in Fortaleza-CE and Parnaíba-PI were evaluated. The abbreviations PI, CE, and GO refer to the states of Piauí, Ceará, and Goiás, respectively, while DF stands for the Federal District

| Species | Germplasm ID | Elevation (m) | Municipality | State | Voucher | Geographic Coordinates | Morphological Description | Type of analysis |
| --- | --- | --- | --- | --- | --- | --- | --- | --- |
| *A. occidentale* | AN-700 | 271 | Bom Jesus | PI | 88.968 | 09°05’03.1’’S,  44°20’23.3” W | Tree, red peduncle | Agronomy, cytometry and molecular |
| *A. occidentale* | AN-701 | 264 | Bom Jesus | PI | 88.969 | 09°05’03.5” S,  44°20’23.3” W | Tree, yellow peduncle | Agronomy, cytogenetics, cytometry and molecular |
| *A. occidentale* | AN-702 | 270 | Bom Jesus | PI | 88.970 | 09°05'51.5"S,  44°20'33.1" W | Tree, yellow peduncle | Agronomy and molecular |
| *A. occidentale* | AN-703 | 263 | Bom Jesus | PI | 88.971 | 09°05’53.5” S,  44°20’34.8” W | Tree, red peduncle | Agronomy and molecular |
| *A. occidentale* | AN-704 | 262 | Bom Jesus | PI | 88.972 | 09°05’51.7” S,  44°20’34.7” W | Tree, red peduncle | Agronomy, cytogenetics, cytometry and molecular |
| *A. occidentale* | AN-705 | 221 | Alvorada do Gurguéia | PI | 88.973 | 08°22’35.0” S,  43°51’27.1” W | Tree, red peduncle | Agronomy, cytometry and molecular |
| *A. occidentale* | AN-706 | 117 | Alvorada do Gurguéia | PI | 88.974 | 08°22’35.5” S,  43°51’30.5” W | Tree, yellow peduncle | Agronomy, cytogenetics and cytometry |
| *A. occidentale* | AN-707 | 114 | Alvorada do Gurguéia | PI | 88.975 | 08°22’32.4” S,  43°51’31.2” W | Tree, yellow peduncle | Agronomy and cytogenetics |
| *A. occidentale* | AN-708 | 103 | Alvorada do Gurguéia | PI | 88.976 | 08°22’53.3” S,  43°51’41.9” W | Tree, yellow peduncle | Agronomy, cytogenetics and molecular |
| *A. occidentale* | AN-709 | 202 | Alvorada do Gurguéia | PI | 88.977 | 08°22’43.1” S,  43°51’38.2” W | Tree, yellow peduncle | Agronomy, cytometry and molecular |
| *A. humile* | AN-710 | 366 | Corrente dos Matões- Bom Jesus | PI | 88.978 | 09°08’31.7” S,  44°40’36.7” W | Shrub, orange peduncle | Agronomy |
| *A. humile* | AN-711 | 364 | Corrente dos Matões- Bom Jesus | PI | 88.979 | 09°08’30.3” S,  44°40’36.5” W | Shrub, yellow peduncle | Agronomy, Cytogenetics and molecular |
| *A. humile* | AN-712 | 361 | Corrente dos Matões-Bom Jesus | PI | 88.980 | 09°08’31.3” S,  44°40’36.0” W | Shrub, orange peduncle | Cytogenetics, Cytometry and molecular |
| *A. occidentale* | AN-714 | 340 | Corrente dos Matões- Bom Jesus | PI | 88.982 | 09°09’06.9” S,  44°37’23.4” W | Tree, orange/yellowish peduncle | Cytogenetics and molecular |
| *A. occidentale* | AN-715 | 366 | Currais | PI | 88.983 | 09°01’05.6” S,  44°23’52.0” W | Tree, orange peduncle | Agronomy, cytogenetics and molecular |
| *A. occidentale* | AN-716 | 377 | Currais | PI | 88.984 | 09°00'52.7" S,  44°23'45.8" W | Tree, orange/yellowish peduncle | Agronomy |
| *A. occidentale* | AN-717 | 368 | Currais | PI | 88.985 | 09°00’52.6” S,  44°23’46.5” W | Tree, red/orange peduncle | Agronomy, cytometry and molecular |
| *A. occidentale* | AN-718 | 378 | Currais | PI | 88.986 | 09°00'51.4"S  44°23'48.5" W | Tree, yellow peduncle | Agronomy and molecular |
| *A. occidentale* | AN-719 | 379 | Currais | PI | 88.987 | 09°00’52.3” S,  44°23’47.4” W | Tree, yellow peduncle | Agronomy, cytometry and molecular |
| *A. occidentale* | AN-800 | 10 | Parnaíba | PI | 90.237 | 02°51'5.26"S  41°46'0.03"W | Tree, yellow peduncle | Agronomy and molecular |
| *A. occidentale* | AN-801 | 6 | Parnaíba | PI | 90.238 | 02°51'6.85" S,  41°45'54.21" W | Tree, yellow peduncle | Agronomy, cytogenetics, cytometry and molecular |
| *A. occidentale* | AN-802 | 2 | Parnaíba | PI | 90.239 | 02°51'4.49" S,  41°45'53.95" W | Tree, yellow peduncle | Agronomy |
| *A. occidentale* | AN-803 | 10 | Parnaíba | PI | 90.240 | 02°50'4.86" S  41°44'21.85" W | Tree, yellow peduncle | Agronomy, cytogenetics and molecular |
| *A. occidentale* | AN-804 | 9 | Parnaíba | PI | 90.241 | 02°50'7.56" S,  41°44'20.04" W | Tree, yellow peduncle | Agronomy |
| *A. occidentale* | AN-808 | 48 | Buriti dos Lopes | PI | 90.245 | 03°11'34.64" S,  41°52'43.70" W | Tree, yellow peduncle | Agronomy |
| *A. occidentale* | AN-809 | 46 | Buriti dos Lopes | PI | 90.246 | 03°12'27.43" S,  41°52'02.51" W | Tree, yellow peduncle | Agronomy |
| *A. occidentale* | AN-810 | 45 | Buriti dos Lopes | PI | 90.247 | 03°12'2.41" S,  41°52'02.27" W | Tree, yellow peduncle | Agronomy |
| *A. humile* | AN-830 | - | Uruçuí | PI | - | 08°59'28.9" S  45°05'24.7" W | Shrub, yellow peduncle | Molecular |
| *A. occidentale* | BGC-45 | - | CNPAT | GO | - | 16°13'44.6" S  47°58'15.2" W | - | Cytogenetics and cytometry |
| *A. occidentale* | BGC-45.2 | - | CNPAT | GO | - | 16°13'44.6" S  47°58'15.2" W | - | Molecular |
| *A. occidentale* | BGC-45.4 | - | CNPAT | GO | - | 16°13'44.6" S  47°58'15.2" W | - | Molecular |
| *A. occidentale* | BGC-46 | - | CNPAT | GO | - | 16°13'44.6" S  47°58'15.2" W | - | Molecular |
| *A. occidentale* | Clone BRS 226 | - | CNPAT | CE | - | - | Tree, red/orange peduncle | Cytogenetics and molecular |
| *A. occidentale* | Clone BRS 226 | - | Parnaíba | PI | - | 09°04'54.5" S  44°19'40.3" W | Tree, red/orange peduncle | Agronomy |
| *A. humile* | 663 | - | Brasília | DF | - | - | without fruits and pseudofruits | Molecular |
| *A. humile* | 670 | - | Brasília | DF | - | - | without fruits and pseudofruits | Molecular |
| *A. occidentale* | Goiás | - | Santa Rosa de Goiás | GO | - | 16°01'54.8" S  49°26'40.9" W | Tree, red peduncle | Molecular |

**Table S2** PCR (*Polymerase Chain Reaction*) programs used for amplification of nuclear and plastid loci

| Locus | Denaturation | 35 cycles | | | Final Extension |
| --- | --- | --- | --- | --- | --- |
| Denaturation | Annealing | Extension |
| *matK* | 4 min at 94°C | 1 min at 94°C | 1 min at 55°C | 2 min at 72°C | 8 min at 65°C |
| *rps16, trnL-F and ycf1* | 5 min at 95°C | 1 min at 95°C | 1 min at 56°C | 1 min at 72°C | 10 min at 72°C |
| *ITS* | 5 min at 95°C | 1 min at 95°C | 1 min at 55°C | 1 min at 72°C | 10 min at 72°C |

**Table S3** The samples used in the phylogenetic analyses. Species sampled, voucher information, and GenBank accession numbers. Sequences taken from GenBank are listed with the corresponding publication. New sequences were generated during this study

| Taxa | Accession | *ITS* | *matK* | *rps16* | *trnL_trnF* | *ycf1* | Citation (s) |  |
| --- | --- | --- | --- | --- | --- | --- | --- | --- |
| *Spondias mombin* Jacq | - | AF445882 | NC_035973 | NC_035973 | KR081860 | NC_035973 | Becerra (2003) |
| *Fegimanra africana* (Oliv.) Pierre | - | - | AY594489 | AY594599 | AY594515 | - | Pell (2004) |
| *Mangifera indica* L. | - | MF678509 | - | - | - | NC_035239 | Fitmawati et al. (2017); Rabah et al. (2017) |
| *Anacardium excelsum* (Bertero & Balb. ex Kunth) Skeels | Montiel 32769; BioBot02020; Daly 13970 | KF664193 | JQ586468 | KP055362 | KP055484 | - | Xie et al. (2014); Weeks et al. (2014) |
| *Anacardium parvifolium* Ducke | Reserva Ducke (INPA) | - | - | KP055364 | KP055485 | - | Weeks et al. (2014) |
| *Anacardium spruceanum* Beth.ex Engl. | INPA2527 | - | - | KP055365 | KP055486 | - | Weeks et al. (2014) |
| *Anacardium occidentale* L. | Zhang L sn (KUN) | KF664192; AB071690 | NC_035235 | KF664442 | AY594497 | NC_035235 | Yonemori et al. (2002); Pell (2004); Xie et al. (2014); Rabah et al. (2017) |
| *Anacardium occidentale* | AN-700 | - | - | - | - | PRJNA1224782 | This study |
| *Anacardium occidentale* | AN-701 | PV089646 | - | - | - | PRJNA1224782 | This study |
| *Anacardium occidentale* | AN-702 | - | - | - | - | PRJNA1224782 | This study |
| *Anacardium occidentale* | AN-703 | PV089647 | PRJNA1224782 | PRJNA1224782 | PRJNA1224782 | PRJNA1224782 | This study |
| *Anacardium occidentale* | AN-704 | PV089648 | - | - | - | PRJNA1224782 | This study |
| *Anacardium occidentale* | AN-705 | PV089649 | PRJNA1224782 | PRJNA1224782 | PRJNA1224782 | PRJNA1224782 | This study |
| *Anacardium occidentale* | AN-708 | - | - | - | - | PRJNA1224782 | This study |
| *Anacardium occidentale* | AN-709 | PV089650 | PRJNA1224782 | PRJNA1224782 | PRJNA1224782 | PRJNA1224782 | This study |
| *Anacardium humile* A.St.-Hil. | AN-711 | - | PRJNA1224782 | PRJNA1224782 | PRJNA1224782 | PRJNA1224782 | This study |
| *Anacardium occidentale* | AN-714 | PV089651 | PRJNA1224782 | PRJNA1224782 | PRJNA1224782 | PRJNA1224782 | This study |
| *Anacardium humile* | AN-712 | PV089703 | PRJNA1224782 | PRJNA1224782 | PRJNA1224782 | PRJNA1224782 | This study |
| *Anacardium occidentale* | AN-715 | PV089652 | - | - | - | PRJNA1224782 | This study |
| *Anacardium occidentale* | AN-717 | PV089653 | PRJNA1224782 | PRJNA1224782 | PRJNA1224782 | PRJNA1224782 | This study |
| *Anacardium occidentale* | AN-718 | - | - | - | - | PRJNA1224782 | This study |
| *Anacardium occidentale* | AN-719 | PV089654 | - | - | - | - | This study |
| *Anacardium occidentale* | AN-800 | PV089655 | PRJNA1224782 | PRJNA1224782 | PRJNA1224782 | PRJNA1224782 | This study |
| *Anacardium occidentale* | AN-801 | PV089656 | - | - | - | PRJNA1224782 | This study |
| *Anacardium occidentale* | AN-803 | PV089657 | PRJNA1224782 | PRJNA1224782 | PRJNA1224782 | PRJNA1224782 | This study |
| *Anacardium occidentale* | BGC-45.4 | PV089661 | PRJNA1224782 | PRJNA1224782 | PRJNA1224782 | PRJNA1224782 | This study |
| *Anacardium occidentale* | BRS 226 | PV089659 | PRJNA1224782 | PRJNA1224782 | PRJNA1224782 | PRJNA1224782 | This study |
| *Anacardium occidentale* | BGC-45.2 | PV089660 | - | - | - | PRJNA1224782 | This study |
| *Anacardium occidentale* | BGC-46 | - | PRJNA1224782 | PRJNA1224782 | PRJNA1224782 | PRJNA1224782 | This study |
| *Anacardium humile* | 830 | - | PRJNA1224782 | PRJNA1224782 | PRJNA1224782 | PRJNA1224782 | This study |
| *Anacardium occidentale* | Goiás | PV089658 | PRJNA1224782 | PRJNA1224782 | PRJNA1224782 | PRJNA1224782 | This study |
| *Anacardium humile*  *Anacardium humile* | 663  670 | -  - | PRJNA1224782  - | PRJNA1224782  - | PRJNA1224782  - | -  PRJNA1224782 | This study  This study |

Note: “-” indicates sequence not available.

References

Becerra JX (2003) Evolution of Mexican *Bursera* (Burseraceae) inferred from *ITS*, *ETS*, and 5S nuclear ribosomal DNA sequences. Mol Phylogenet Evol 26:300–309. <https://doi.org/10.1016/s1055-7903(02)00256-7>

Fitmawati, Harahap SP, Sofiyanti N (2017) Phylogenetic analysis of mango (*Mangifera*) in Northern Sumatra based on gene sequences of cpDNA *trnL-F* intergenic spacer. Biodiversitas 18:715–719. <https://doi.org/10.13057/biodiv/d180238>

Pell SK (2004) Molecular systematics of the cashew family (Anacardiaceae). Dissertation, Louisiana State University

Rabah SO, Lee C, Hajrah NH, Makki RM, Alharby HF, Alhebshi AM, Sabir JSM, Jansen RK, Ruhlman TA (2017) Plastome Sequencing of ten nonmodel crop species uncovers a large insertion of mitochondrial DNA in cashew. Plant Genome 10:1–14. <https://doi.org/10.3835/plantgenome2017.03.0020>

Weeks A, Zapata F, Pell SK, Daly DC, Mitchell JD, Fine PVA (2014) To move or to evolve: contrasting patterns of intercontinental connectivity and climatic niche evolution in “Terebinthaceae” (Anacardiaceae and Burseraceae). Front Genet 5:1–20. <https://doi.org/10.3389/fgene.2014.00409>

Xie L, Yang ZY, Wen J, Li DZ, Yi TS (2014) Biogeographic history of *Pistacia* (Anacardiaceae), emphasizing the evolution of the Madrean-Tethyan and the eastern Asian-Tethyan disjunctions. Mol Phylogenet Evol 77:136–146. <https://doi.org/10.1016/j.ympev.2014.04.006>

**Table S4** Qualitative data of pseudofruits (peduncles) from *Anacardium occidentale* L.and *A. humile* A.St.-Hil. accessions of the Active Germplasm Bank

| BAG ID1 | CAS2 | SCAB3 | RCA4 | CAA5 | GACA6 | CACA7 | SCA8 |
| --- | --- | --- | --- | --- | --- | --- | --- |
| AN-700 | Conical to obovate | Angular | Broken | Level | Shallow | Shallow | Smooth and glossy |
| AN-701 | Cylindrical | Flattened | Absent | Level | Shallow | Shallow | Smooth and glossy |
| AN-702 | Round | Obliquely flattened | Absent | Level | Absent | Shallow | Smooth and glossy |
| AN-703 | Round | Obliquely flattened | Absent | Level | Deep | Shallow | Smooth and glossy |
| AN-704 | Cylindrical | Angular | Absent | Level | Shallow | Deep | Smooth and glossy |
| AN-705 | Conical to obovate | Angular | Absent | Level | Absent | Shallow | Smooth and glossy |
| AN-706 | Round | Obliquely flattened | Broken | Level | Absent | Shallow | Smooth and glossy |
| AN-707 | Conical to obovate | Obliquely flattened | Absent | Level | Shallow | Deep | Smooth and glossy |
| AN-708 | Pyriform | Obliquely flattened | Broken | Level | Shallow | Deep | Smooth and glossy |
| AN-709 | Round | Obliquely flattened | Entire | Level | Deep | Shallow | Smooth and glossy |
| AN-710 | Round | Obliquely flattened | Absent | Level | Absent | Shallow | Smooth and glossy |
| AN-711 | Conical to obovate | Obliquely flattened | Absent | Level | Absent | Deep | Smooth and glossy |
| AN-715 | Conical to obovate | Angular | Absent | Level | Shallow | Shallow | Smooth and glossy |
| AN-716 | Round | Rounded | Absent | Level | Absent | Shallow | Smooth and glossy |
| AN-717 | Round | Obliquely flattened | Absent | Level | Deep | Absent | Smooth and glossy |
| AN-718 | Conical to obovate | Angular | Absent | Level | Shallow | Deep | Rough and dull |
| AN-719 | Conical to obovate | Angular | Broken | Level | Shallow | Shallow | Smooth and glossy |
| AN-800 | Round | Obliquely flattened | Entire | Level | Absent | Shallow | Smooth and glossy |
| AN-801 | Conical to obovate | Angular | Entire | Level | Shallow | Shallow | Smooth and glossy |
| AN-802 | Conical to obovate | Rounded | Entire | Level | Shallow | Shallow | Smooth and glossy |
| AN-803 | Round | Rounded | Absent | Oblique | Shallow | Shallow | Smooth and glossy |
| AN-804 | Round | Rounded | Absent | Level | Absent | Shallow | Smooth and glossy |
| AN-808 | Conical to obovate | Angular | Broken | Level | Absent | Shallow | Smooth and glossy |
| AN-809 | Conical to obovate | Obliquely flattened | Broken | Level | Shallow | Shallow | Smooth and glossy |
| AN-810 | Conical to obovate | Obliquely flattened | Broken | Level | Shallow | Shallow | Smooth and glossy |
| BRS 226 | Cylindrical | Flattened | Entire | Level | Absent | Shallow | Smooth and glossy |

BAG ID1 - Identification of the accessions in the Germplasm Bank

CAS2 – Cashew apple shape

SCAB3 – Shape of cashew apple base

RCA4 – Ridges on cashew apple

CAA5 – Cashew apple apex

GACA6 – Grooves on apex cashew apple

CACA7 – Cavity at apex cashew apple

SCA8 – Skin of cashew apple

**Table S5** Scott-Knott analysis based on agronomic data of pseudofruits (peduncles) from accessions of the Active Germplasm Bank of *A. occidentale* L.and *A. humile* A.St.-Hil.

| BAG ID2 | LeCA3  (cm) | WiCA4  (cm) | DiCA5  (cm) | WeCA 6  (g) | TSS7  (%) | *L8* | *a9* | *b10* |
| --- | --- | --- | --- | --- | --- | --- | --- | --- |
| AN-700 | 3.48 e1 | 2.28 e | 2.10 f | 8.52 e | 15.2 c | 61.33 d | 23.79 c | 30.03 g |
| AN-701 | 2.20 i | 1.92 g | 1.91 f | 5.02 f | 15.9 b | 68.31 b | 13.57 f | 50.32 c |
| AN-702 | 2.15 i | 2.24 e | 2.04 f | 6.92 f | 14.0 c | 69.61 b | 18.24 d | 48.67 d |
| AN-703 | 2.24 i | 2.04 f | 1.91 f | 5.44 f | 16.2 b | 57.61 e | 34.08 a | 33.29 f |
| AN-704 | 5.04 b | 2.21 e | 2.17 e | 12.13 e | 16.5 b | 68.86 b | 20.78 d | 47.60 d |
| AN-705 | 2.13 i | 1.84 h | 1.83 g | 3.91 f | 13.6 d | 57.90 e | 33.66 a | 34.41 f |
| AN-706 | 2.44 h | 2.57 d | 2.52 d | 9.19 e | 14.0 c | 75.03 a | 12.35 g | 48.68 d |
| AN-707 | 2.45 h | 2.42 e | 2.32 e | 9.14 e | 15.1 c | 70.10 b | 17.25 e | 55.71 b |
| AN-708 | 2.70 g | 2.35 e | 2.50 d | 9.16 e | 13.4 d | 71.94 b | 14.60 e | 54.92 b |
| AN-709 | 2.27 i | 2.27 e | 2.24 e | 7.42 e | 12.3 e | 67.64 b | 13.57 f | 51.44 c |
| AN-710 | 1.92 j | 2.14 f | 2.33 e | 6.46 f | 17.4 b | 62.57 d | 16.39 e | 36.71 e |
| AN-711 | 2.21 i | 1.68 i | 1.82 g | 4.33 f | 19.6 a | 65.31 c | 24.51 c | 49.82 c |
| AN-715 | 2.96 f | 1.92 g | 1.79 g | 5.22 f | 17.3 b | 59.45 e | 24.83 c | 38.18 e |
| AN-716 | 1.50 k | 1.62 i | 1.57 h | 3.31 f | 20.0 a | 61.66 d | 23.22 c | 50.93 c |
| AN-717 | 2.01 j | 2.05 f | 1.98 f | 5.20 f | 14.8 c | 58.80 e | 27.24 b | 37.53 e |
| AN-718 | 2.30 i | 1.95 g | 1.81 g | 5.36 f | 16.0 b | 59.79 e | 19.34 d | 47.31 d |
| AN-719 | 2.86 g | 2.01 g | 2.06 f | 6.91 f | 13.0 d | 59.63 e | 30.66 a | 39.53 e |
| AN-800 | 3.14 f | 3.74 b | 3.55 b | 29.07 c | 13.4 d | 74.93 a | 10.93 g | 56.36 b |
| AN-801 | 4.34 c | 3.56 b | 3.43 b | 31.37 c | 13.4 d | 69.93 b | 15.24 e | 60.83 a |
| AN-802 | 3.94 d | 3.68 b | 3.51 b | 34.06 b | 14.0 c | 75.41 a | 5.48 g | 55.08 b |
| AN-803 | 2.29 i | 2.63 d | 2.62 d | 10.14 e | 15.4 b | 69.21 b | 14.09 f | 49.12 c |
| AN-804 | 2.88 g | 3.08 c | 3.04 c | 18.81 d | 14.3 c | 70.19 b | 11.41 g | 58.42 a |
| AN-808 | 3.01 f | 2.13 f | 1.82 g | 7.54 e | 13.5 d | 76.17 a | 10.05 g | 55.16 b |
| AN-809 | 1.98 j | 2.10 f | 2.00 f | 6.22 f | 16.1 b | 71.08 b | 12.11 g | 52.67 b |
| AN-810 | 2.00 j | 1.86 h | 1.79 g | 5.86 f | 13.1 d | 67.27 b | 16.09 e | 53.48 b |
| BRS 226 | 6.21 a | 5.29 a | 5.08 a | 104.02 a | 11.1 e | 59.71 e | 32.51 a | 45.79 d |
| CV (%) | 10.41 | 9.25 | 9.95 | 36.6 | 13.86 | 5.91 | 20.43 | 8.35 |

1Means followed by the same letter in the column do not differ significantly from each other (p ≤ 0.01)

BAG ID2 – Identification of the accessions in the Germplasm Bank

LeCA3 – Length cashew apple

WiCA4 – Width cashew apple

DiCA5 – Diameter cashew apple

WeCA6 – Weight cashew apple

TSS7 – Total soluble solids content

*L*8 – Lightness

*a*9 – Red/green coordinate (+*a* indicates red and –*a* indicates green)

*b*10 – Yellow/blue coordinate (+*b* indicates yellow and –*b* indicates blue)

**Table S6** Qualitative data of fruits (cashew nuts) from accessions of the Active Germplasm Bank of *A. occidentale* L.and *A. humile* A.St.-Hil.

| BAG ID1 | RPSA2 | SNA3 | SN4 | SNB5 | NS6 | FN7 | SSN8 |
| --- | --- | --- | --- | --- | --- | --- | --- |
| AN-700 | In front of apex | Intermediate | Rounded | Flattened | Oblong-ellipsoid | Rounded | Large |
| AN-701 | In front of apex | Round | Angular | Flattened | Kidney-shaped | Rounded | Small |
| AN-702 | In front of apex | Round | Angular | Flattened | Kidney-shaped | Flattened | Large |
| AN-703 | In front of apex | Round | Rounded | Flattened | Kidney-shaped | Flattened | Large |
| AN-704 | In front of apex | Round | Rounded | Flattened | Kidney-shaped | Rounded | Large |
| AN-705 | In front of apex | Round | Angular | Flattened | Kidney-shaped | Flattened | Small |
| AN-706 | In front of apex | Pointed | Angular | Obliquely flattened | Kidney-shaped | Rounded | Large |
| AN-707 | In front of apex | Round | Angular | Flattened | Kidney-shaped | Flattened | Large |
| AN-708 | In front of apex | Intermediate | Rounded | Flattened | Kidney-shaped | Flattened | Small |
| AN-709 | In front of apex | Intermediate | Angular | Flattened | Oblong-ellipsoid | Flattened | Large |
| AN-710 | In front of apex | Intermediate | Angular | Flattened | Oblong-ellipsoid | Flattened | Large |
| AN-711 | In front of apex | Round | Angular | Flattened | Oblong-ellipsoid | Flattened | Large |
| AN-715 | In front of apex | Round | Angular | Flattened | Oblong-ellipsoid | Flattened | Large |
| AN-716 | In front of apex | Intermediate | Angular | Flattened | Kidney-shaped | Rounded | Large |
| AN-717 | In front of apex | Round | Rounded | Flattened | Kidney-shaped | Flattened | Large |
| AN-718 | In front of apex | Round | Angular | Flattened | Kidney-shaped | Flattened | Large |
| AN-719 | In front of apex | Round | Rounded | Flattened | Oblong-ellipsoid | Bulging | Small |
| AN-800 | In front of apex | Intermediate | Angular | Rounded | Kidney-shaped | Rounded | Large |
| AN-801 | In front of apex | Intermediate | Rounded | Rounded | Kidney-shaped | Flattened | Large |
| AN-802 | In line with apex | Round | Angular | Rounded | Kidney-shaped | Flattened | Large |
| AN-803 | In front of apex | Intermediate | Angular | Flattened | Kidney-shaped | Flattened | Large |
| AN-804 | In front of apex | Round | Rounded | Flattened | Kidney-shaped | Flattened | Small |
| AN-808 | In front of apex | Round | Angular | Rounded | Kidney-shaped | Flattened | Small |
| AN-809 | In front of apex | Round | Angular | Rounded | Kidney-shaped | Flattened | Small |
| AN-810 | In front of apex | Round | Angular | Rounded | Kidney-shaped | Flattened | Large |
| BRS 226 | In line with apex | Round | Angular | Rounded | Kidney-shaped | Flattened | Large |

BAG ID1 – Identification of the accessions in the Germplasm Bank

RPSA2 – Relative position of suture and apex

SN3 – Suture of nut

SNA4 – Shape of nut apex

SNB5 – Shape of nut base

NS6 – Nut shape

FN7 – Flanks of nut

SSN8 – Stylar scar on nut

**Table S7** Scott-Knott analysis based on agronomic data of fruits (cashew nuts) from accessions of the Active Germplasm Bank of *A. occidentale* L.and *A. humile* A.St.-Hil.

| BAG ID2 | NL3  (cm) | NW4  (cm) | NT5  (cm) | WeN6  (g) | *L7* | *a8* | *b9* |
| --- | --- | --- | --- | --- | --- | --- | --- |
| AN-700 | 1.51 h 1 | 1.69 d | 1.05 f | 1.20 f | 57.99 a | -2.53 f | 19.21 a |
| AN-701 | 1.62 g | 1.49 f | 1.08 e | 1.46 e | 54.95 b | -0.62 e | 16.87 b |
| AN-702 | 1.76 f | 1.54 e | 1.02 f | 1.56 e | 50.97 c | 0.54 d | 20.09 a |
| AN-703 | 1.60 g | 1.29 h | 0.92 h | 1.10 f | 52.48 c | -1.61 f | 14.96 c |
| AN-704 | 1.82 f | 1.56 e | 1.12 e | 1.74 e | 51.06 c | 1.16 c | 20.15 a |
| AN-705 | 1.84 f | 1.40 g | 0.98 g | 1.38 f | 52.82 c | 1.19 c | 19.61 a |
| AN-706 | 1.69 g | 1.45 f | 0.97 g | 1.55 e | 58.29 a | -1.28 e | 17.84 b |
| AN-707 | 1.43 h | 1.48 f | 0.99 g | 1.50 e | 50.20 c | -0.20 d | 15.26 c |
| AN-708 | 1.67 g | 1.62 e | 1.10 e | 1.52 e | 48.74 d | 3.49 a | 16.52 b |
| AN-709 | 2.01 e | 1.58 e | 0.92 h | 1.68 e | 47.55 d | -2.16 f | 13.53 d |
| AN-710 | 1.59 g | 1.48 f | 1.10 e | 1.36 f | 41.66 f | -1.87 f | 14.16 c |
| AN-711 | 1.61 g | 1.61 e | 1.04 f | 1.33 f | 55.67 b | -1.06 e | 20.19 a |
| AN-715 | 1.58 g | 1.18 i | 0.83 i | 1.10 f | 59.43 a | -2.50 f | 16.58 b |
| AN-716 | 1.77 f | 1.75 d | 1.18 d | 1.81 e | 50.21 c | 1.45 c | 14.86 c |
| AN-717 | 1.60 g | 1.46 f | 1.03 f | 1.37 f | 48.88 d | 1.43 c | 15.74 c |
| AN-718 | 1.55 g | 1.39 g | 0.90 h | 1.03 f | 44.68 e | 0.93 c | 18.37 b |
| AN-719 | 1.5 g | 1.38 g | 0.93 h | 1.44 e | 48.02 d | 1.54 c | 13.12 d |
| AN-800 | 2.36 d | 1.74 d | 1.18 d | 3.48 c | 41.79 f | 0.46 d | 13.07 d |
| AN-801 | 2.64 b | 1.98 c | 1.48 b | 4.67 b | 35.30 h | 1.20 c | 7.84 e |
| AN-802 | 2.50 c | 2.23 b | 1.20 d | 4.37 b | 38.49 g | 0.89 c | 11.70 d |
| AN-803 | 2.06 e | 1.59 e | 1.12 e | 2.77 d | 39.13 g | 1.87 b | 12.67 d |
| AN-804 | 2.09 e | 1.67 d | 1.37 c | 3.00 d | 45.09 e | 1.96 c | 12.42 d |
| AN-808 | 1.61 g | 1.35 g | 1.02 f | 1.24 f | 41.31 f | -1.64 f | 13.08 d |
| AN-809 | 1.86 f | 1.36 g | 1.07 e | 1.75 e | 44.33 e | 1.32 c | 13.01 d |
| AN-810 | 1.85 f | 1.36 g | 1.08 e | 1.60 e | 42.04 f | -1.98 f | 13.08 d |
| BRS 226 | 3.63 a | 2.99 a | 2.22 a | 10.93 a | 57.13 a | 0.19 d | 13.34 d |
| CV (%) | 6.68 | 7.50 | 7.74 | 21.37 | 8.40 | 6450 | 19.25 |

1Means followed by the same letter in the column do not differ significantly from each other (p ≤ 0.01)

BAG ID2 – Identification of the accessions in the Germplasm Bank

NL3 – Nut length

NW4 – Nut width

NT5 – Nut thickness

WeN6 – Weight of nut

*L*7– Lightness

*a*8 – Red/green coordinate (+*a* indicates red and –*a* indicates green)

*b*9 – Yellow/blue coordinate (+*b* indicates yellow and –*b* indicates blue)

**Table S8** Nucleotide diversity index (π) between populations for nuclear and plastidial datasets

| Populations | Nucleotide Diversity (π) | |  |
| --- | --- | --- | --- |
| Nuclear Region | Plastidial Region |
| *A. occidentale* cultivated | 0.028231 +/- 0.017896 | 0.089319 +/- 0.051699 |
| *A. occidentale* Bom Jesus | 0.009852 +/- 0.007094 | 0.000976 +/- 0.001127 |
| *A. occidentale* Alvorada | 0.032895 +/- 0.033707 | 0.002598 +/- 0.002756 |
| *A. occidentale* Currais | 0.002204 +/- 0.002264 | 0.000000 +/- 0.000000 |
| *A. occidentale* Parnaíba | 0.052893 +/- 0.040156 | 0.082844 +/- 0.061894 |
| *A. occidentale* Santa Rosa | 0.000000 +/- 0.000000 | 0.000000 +/- 0.000000 |
| *A. humile* Bom Jesus | 0.000000 +/- 0.000000 | 0.003910 +/- 0.004070 |
| *A. humile* Brasília |  | 0.000000 +/- 0.000000 |
| *A. humile* Uruçuí |  | 0.000000 +/- 0.000000 |

**Table S9** Population differentiation based on allele frequency variance, pairwise FST for the nuclear dataset

| Populations | *A. occidentale* cultivated | *A. occidentale* Bom Jesus | *A. occidentale* Alvorada | *A. occidentale* Currais | *A. occidentale* Parnaíba | *A. occidentale* Santa Rosa | *A. humile* Bom Jesus |  |
| --- | --- | --- | --- | --- | --- | --- | --- | --- |
| *A. occidentale* cultivated | 0.00000 |  |  |  |  |  |  |
| *A. occidentale* Bom Jesus | 0.17088 | 0.00000 |  |  |  |  |  |
| *A. occidentale* Alvorada | 0.12387 | 0.16418 | 0.00000 |  |  |  |  |
| *A. occidentale* Currais | 0.14793 | -0.11392 | 0.20755 | 0.00000 |  |  |  |
| *A. occidentale* Parnaíba | -0.00236 | 0.23596 | 0.06746 | 0.18702 | 0.00000 |  |  |
| *A. occidentale* Santa Rosa | -0.26415 | 0.46667 | -0.28000 | 0.80000 | -0.36735 | 0.00000 |  |
| *A. humile* Bom Jesus | -0.45652 | -0.33333 | -0.77778 | 0.20000 | -0.67500 | 1.00000 | 0.00000 |

**Table S10** Population differentiation based on allele frequency variance, pairwise FST for the plastidial dataset

| Populations | *A. occidentale* cultivated | *A. occidentale* Bom Jesus | *A. occidentale* Alvorada | *A. occidentale* Currais | *A. occidentale* Parnaíba | *A. occidentale* Santa Rosa | *A. humile* Bom Jesus | *A. humile* Brasília | *A. humile* Uruçuí |  |
| --- | --- | --- | --- | --- | --- | --- | --- | --- | --- | --- |
| *A. occidentale* cultivated | 0.00000 |  |  |  |  |  |  |  |  |
| *A. occidentale* Bom Jesus | -0.19191 | 0.00000 |  |  |  |  |  |  |  |
| *A. occidentale* Alvorada | -0.20337 | 0.00000 | 0.00000 |  |  |  |  |  |  |
| *A. occidentale* Currais | -0.78225 | 0.33333 | -0.33333 | 0.00000 |  |  |  |  |  |
| *A. occidentale* Parnaíba | 0.01187 | -0.09512 | -0.08190 | -0.81592 | 0.00000 |  |  |  |  |
| *A. occidentale* Santa Rosa | -0.95350 | 0.92000 | 0.68000 | 1.00000 | -0.82957 | 0.00000 |  |  |  |
| *A. humile* Bom Jesus | 0.61078 | 0.99755 | 0.99020 | 1.00000 | 0.74021 | 1.00000 | 0.00000 |  |  |
| *A. humile* Brasília | -0.21322 | 0.65714 | 0.50000 | 0.37500 | -0.03496 | 0.37500 | 0.98783 | 0.00000 |  |
| *A. humile* Uruçuí | -0.73897 | 0.91667 | 0.68000 | 1.00000 | -0.58351 | 1.00000 | 1.00000 | 0.41176 | 0.00000 |

**Table S11** Significance analysis based on allele frequency variance, pairwise FST for the nuclear dataset

| Populations | *A. occidentale* cultivated | *A. occidentale* Bom Jesus | *A. occidentale* Alvorada | *A. occidentale* Currais | *A. occidentale* Parnaíba | *A. occidentale* Santa Rosa | *A. humile* Bom Jesus |  |
| --- | --- | --- | --- | --- | --- | --- | --- | --- |
| *A. occidentale* cultivated | * |  |  |  |  |  |  |
| *A. occidentale* Bom Jesus | 0.12355+-0.0031 | * |  |  |  |  |  |
| *A. occidentale* Alvorada | 0.20404+-0.0035 | 0.33997+-0.0048 | * |  |  |  |  |
| *A. occidentale* Currais | 0.14909+-0.0038 | 0.99990+-0.0000 | 0.19226+-0.0043 | * |  |  |  |
| *A. occidentale* Parnaíba | 0.55430+-0.0053 | 0.02891+-0.0017 | 0.39244+-0.0055 | 0.10256+-0.0028 | * |  |  |
| *A. occidentale* Santa Rosa | 0.99990+-0.0000 | 0.99990+-0.0000 | 0.99990+-0.0000 | 0.99990+-0.0000 | 0.99990+-0.0000 | * |  |
| *A. humile* Bom Jesus | 0.99990+-0.0000 | 0.99990+-0.0000 | 0.99990+-0.0000 | 0.99990+-0.0000 | 0.99990+-0.0000 | 0.99990+-0.0000 | * |

**Table S12** Significance analysis based on allele frequency variance, pairwise FST for the plastidial dataset

| Populations | *A. occidentale* cultivated | *A. occidentale* Bom Jesus | *A. occidentale* Alvorada | *A. occidentale* Currais | *A. occidentale* Parnaíba | *A. occidentale* Santa Rosa | *A. humile* Bom Jesus | *A. humile* Brasília | *A. humile* Uruçuí |  |
| --- | --- | --- | --- | --- | --- | --- | --- | --- | --- | --- |
| *A. occidentale* cultivated | * |  |  |  |  |  |  |  |  |
| *A. occidentale* Bom Jesus | 0.28245+-0.0043 | * |  |  |  |  |  |  |  |
| *A. occidentale* Alvorada | 0.31343+-0.0044 | 0.99990+-0.0000 | * |  |  |  |  |  |  |
| *A. occidentale* Currais | 0.99990+-0.0000 | 0.99990+-0.0000 | 0.99990+-0.0000 | * |  |  |  |  |  |
| *A. occidentale* Parnaíba | 0.34670+-0.0045 | 0.50460+-0.0050 | 0.50411+-0.0048 | 0.49856+-0.0051 | * |  |  |  |  |
| *A. occidentale* Santa Rosa | 0.99990+-0.0000 | 0.99990+-0.0000 | 0.99990+-0.0000 | 0.99990+-0.0000 | 0.99990+-0.0000 | * |  |  |  |
| *A. humile* Bom Jesus | 0.99990+-0.0000 | 0.99990+-0.0000 | 0.99990+-0.0000 | 0.99990+-0.0000 | 0.99990+-0.0000 | 0.99990+-0.0000 | * |  |  |
| *A. humile* Brasília | 0.26819+-0.0042 | 0.33215+-0.0048 | 0.33106+-0.0044 | 0.33759+-0.0046 | 0.51104+-0.0057 | 0.34086+-0.0049 | 0.33521+-0.0042 | * |  |
| *A. humile* Uruçuí | 0.99990+-0.0000 | 0.99990+-0.0000 | 0.99990+-0.0000 | 0.99990+-0.0000 | 0.99990+-0.0000 | 0.99990+-0.0000 | 0.99990+-0.0000 | 0.99990+-0.0000 | * |

**Table S13** Analysis of Molecular Variance (AMOVA) for seven populations of the nuclear dataset

| Source of variation | *d.f.* | Sum of squares | Variance components | Percentage of variation (%) |  |
| --- | --- | --- | --- | --- | --- |
| Among groups | 2 | 10.613 | -0.36860 Va | -6.63 |
| Among populations within groups | 4 | 27.026 | 0.55368 Vb | 9.96 |
| Within populations | 12 | 64.467 | 5.37222 Vc | 96.67 |
| Total | 18 | 102.105 | 5.55730 |  |
| Fixation Indices |  |  |  |  |
| FSC1  FST2 | 0.108560  0.03330 |  |  |  |
| FCT3 | -0.06633 |  |  |  |

FSC1– Fixation index among subpopulations within clusters

FST2 – Fixation index among subpopulations relative to the total population

FCT3– Fixation index among clusters relative to the total population

**Table S14** Analysis of Molecular Variance (AMOVA) for nine populations of the plastidial dataset

| Source of variation | *d.f.* | Sum of squares | Variance components | Percentage of variation (%) |  |
| --- | --- | --- | --- | --- | --- |
| Among groups | 1 | 123.007 | -0.06342 Va | -0.06 |
| Among populations within groups | 7 | 865.967 | 15.05904 Vb | 13.82 |
| Within populations | 10 | 939.500 | 93.95000 Vc | 86.24 |
| Total | 18 | 1928.474 | 108.94561 |  |
| Fixation Indices |  |  |  |  |
| FSC1  FST2 | 0.13814  0.13764 |  |  |  |
| FCT3 | -0.00058 |  |  |  |

FSC1– Fixation index among subpopulations within clusters

FST2 – Fixation index among subpopulations relative to the total population

FCT3– Fixation index among clusters relative to the total population

**Supplementary Material - Figures**


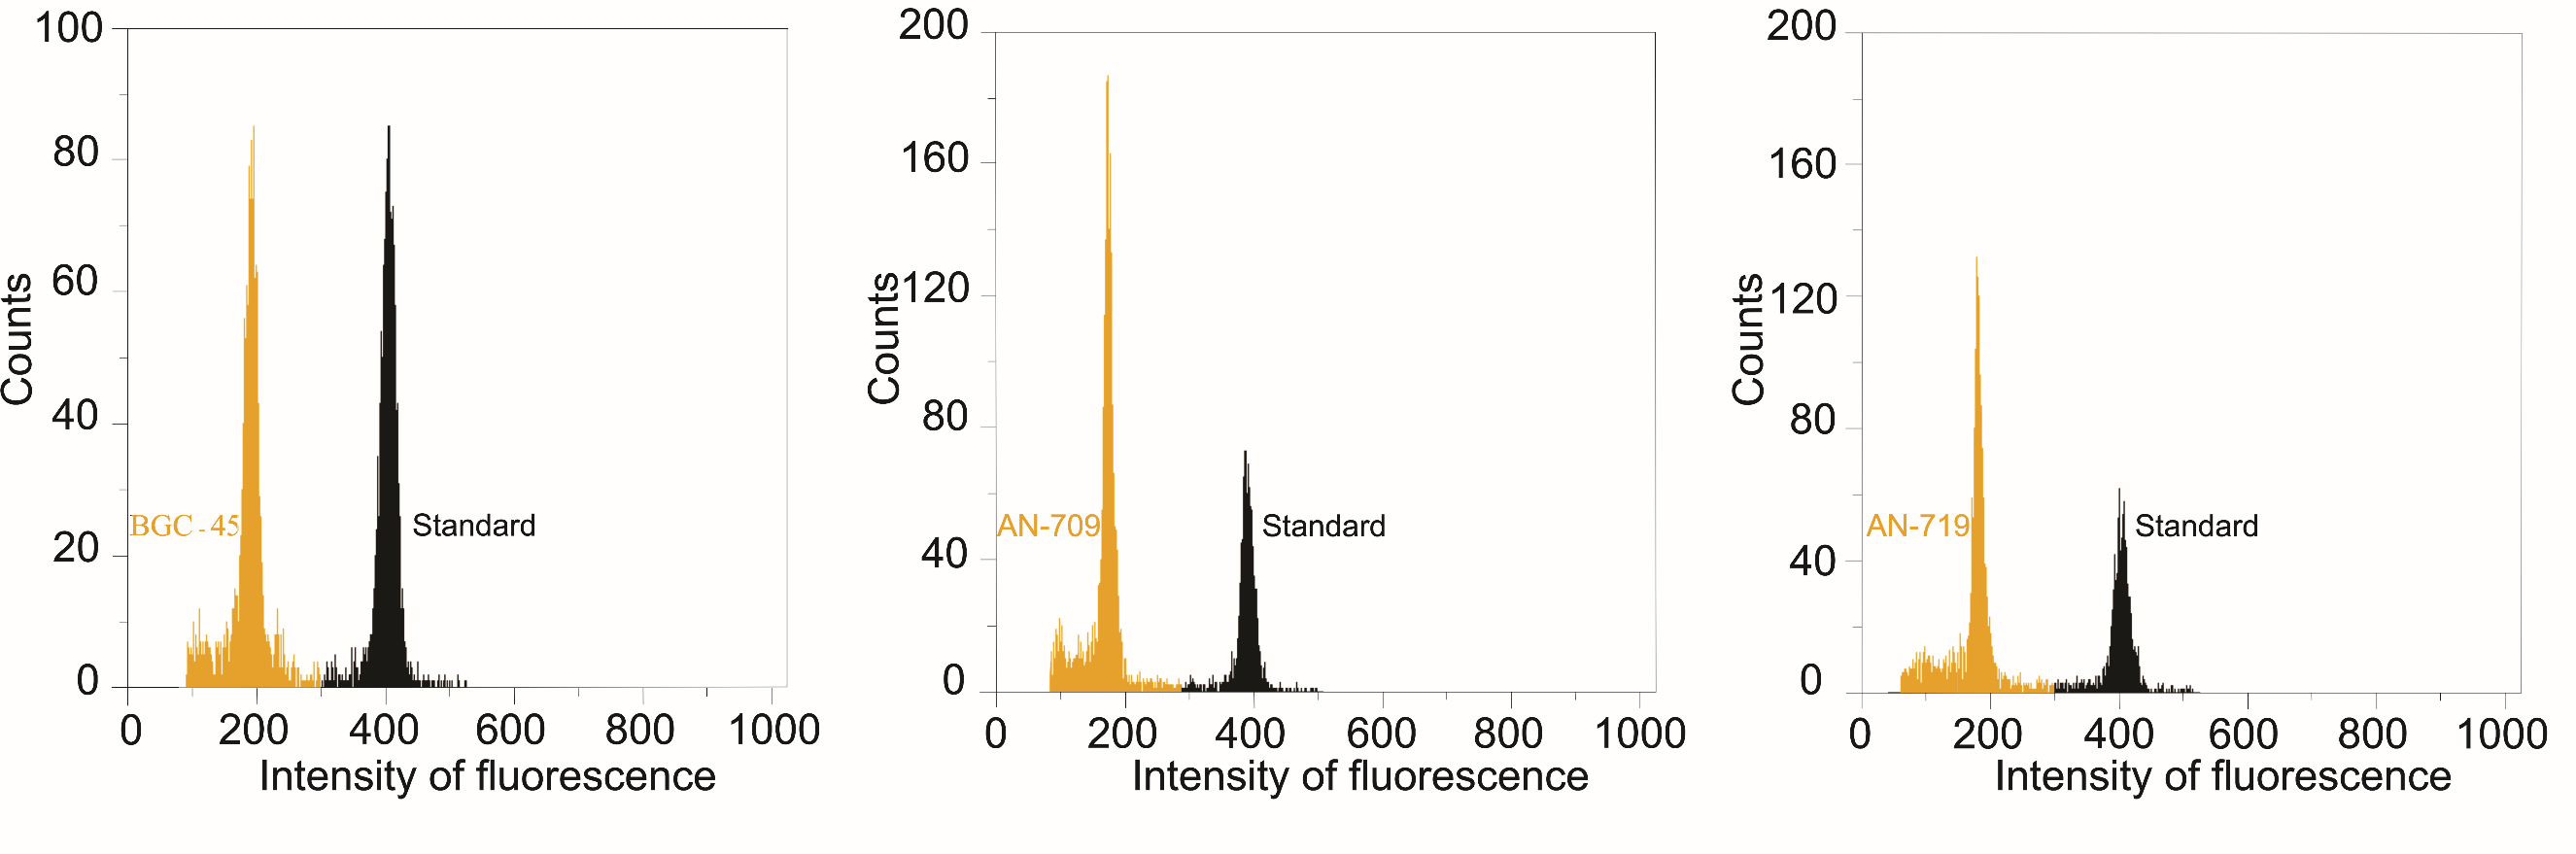


**Figure S1** Histograms of relative fluorescence intensities of nuclei isolated from samples of *Anacardium*. A) *A. occidentale* previously identified as *A. othonianum* (BGC-45), B) *A. occidentale* (AN-709), and C) *A. occidentale* (AN-719) against the internal standard *Solanum lycopersicum*, var. Stupicke (control)


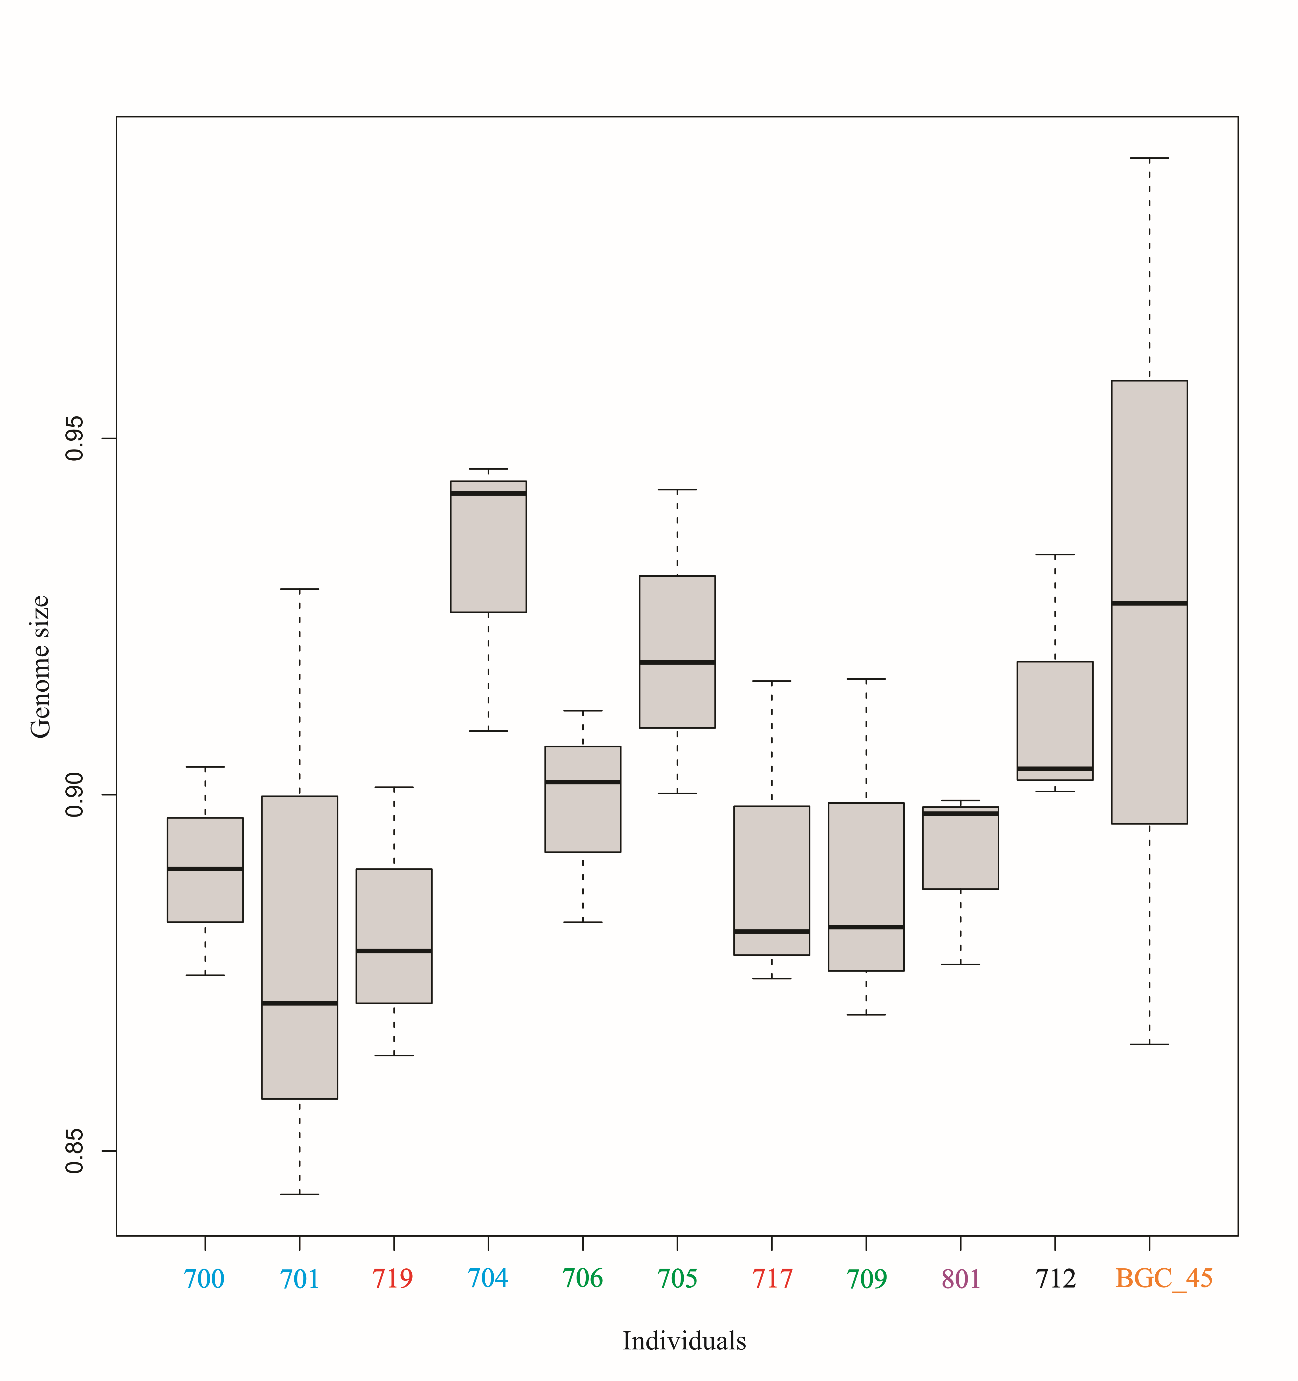


**Figure S2** Distribution of genome size (pg/2C) of *A. occidentale* and *A. humile* accessions across five distinct locations: Bom Jesus highlighted in blue; Alvorada do Gurguéia in green; Currais in red; Parnaíba in purple; Luziânia in orange


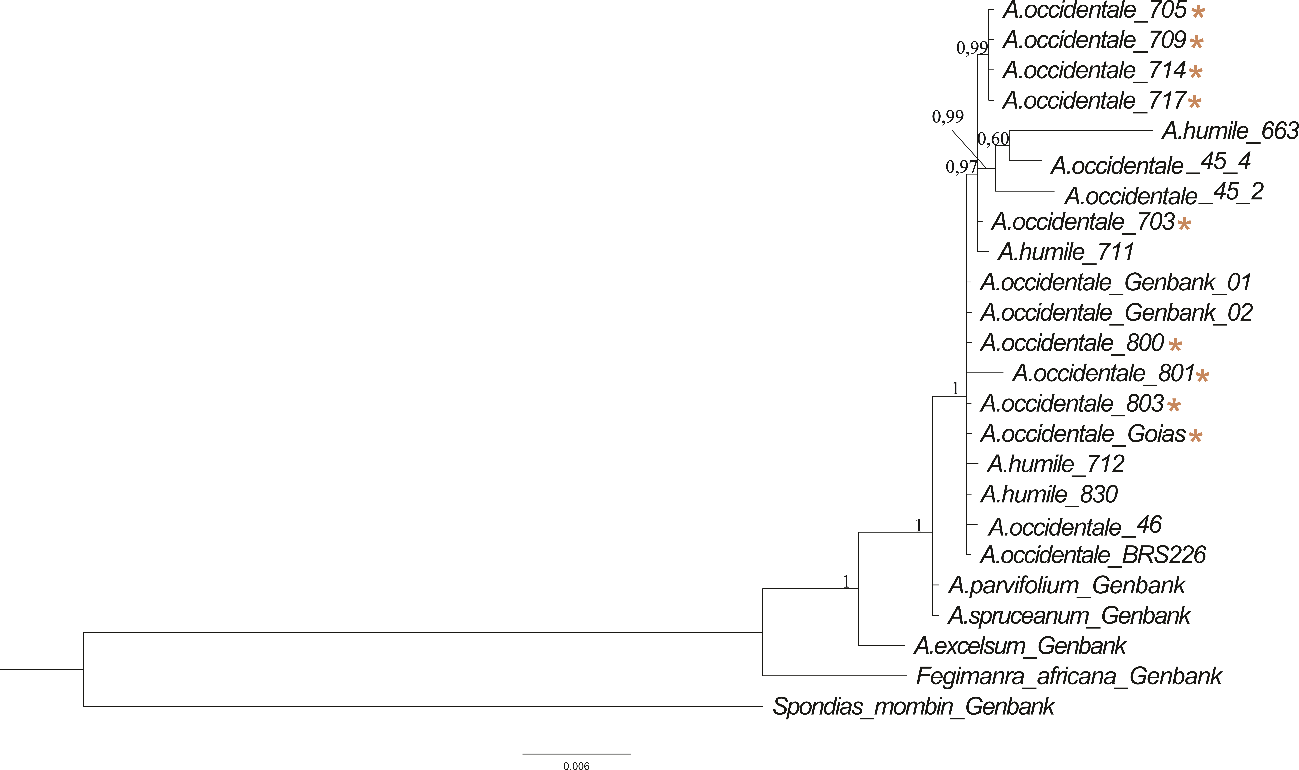


**Figure S3** Bayesian tree of *Anacardium* derived from the analysis of plastidial regions *matK, rps16*, and *trnL-F*. The posterior probability (PP) values are shown for each node, and asterisks indicate tree accessions of *Anacardium occidentale* with cashew-type fruits and cashew apples, i.e., the possible hybrids


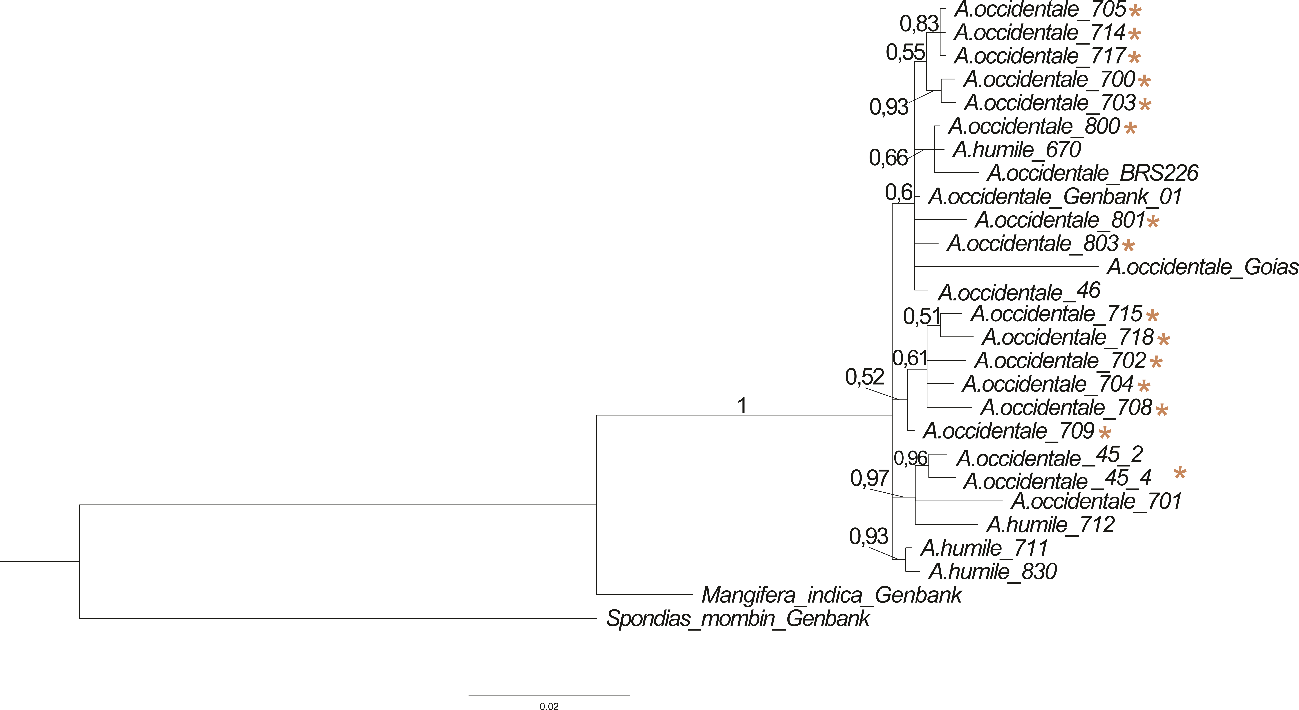


**Figure S4** Bayesian tree of *Anacardium* derived from the analysis of the plastidial region *ycf1*. The posterior probability (PP) values are shown for each node, and asterisks indicate tree accessions of *Anacardium occidentale* with cashew-type fruits and cashew apples, i.e., the possible hybrids


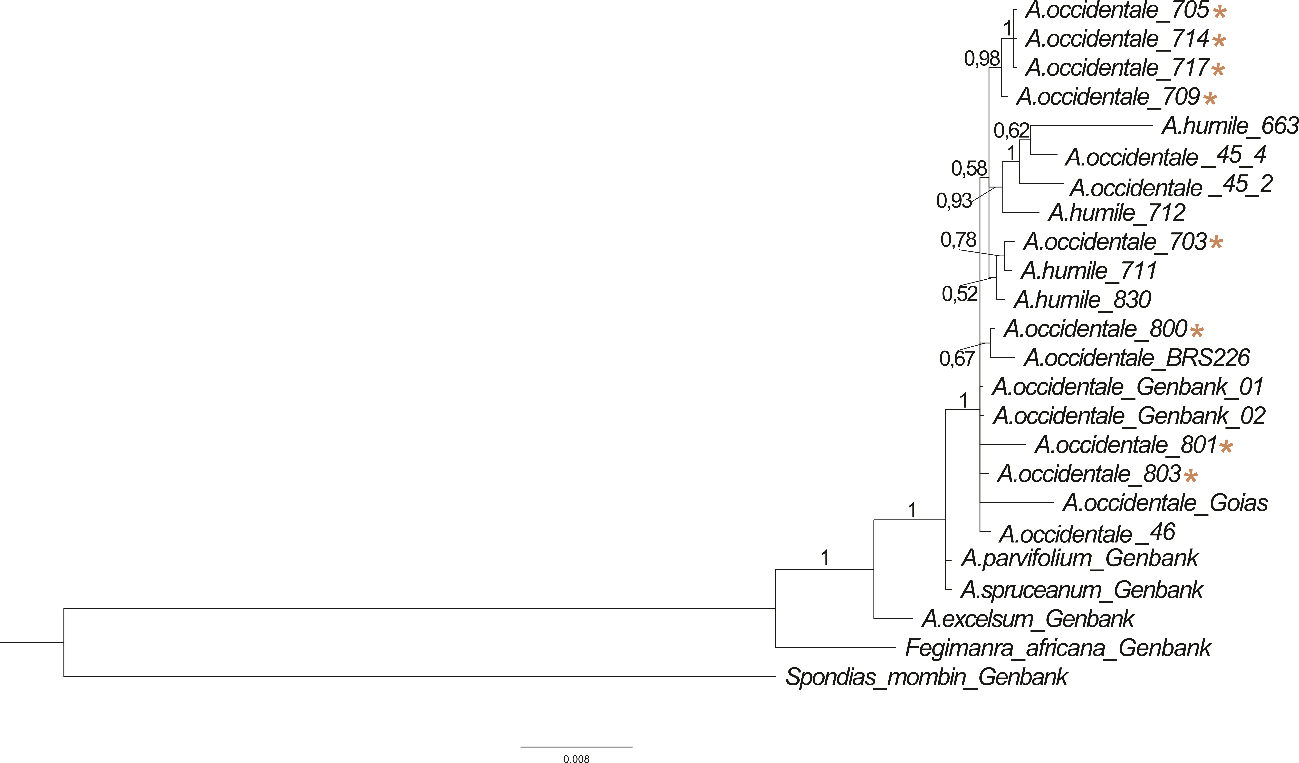


**Figure S5** Bayesian tree of *Anacardium* derived from the analysis of plastidial regions *matK, trnL-F, rps16,* and *ycf1*. The posterior probability (PP) values are shown for each node, and asterisks indicate tree accessions of *Anacardium occidentale* with cashew-type fruits and cashew apples, i.e., the possible hybrids

**
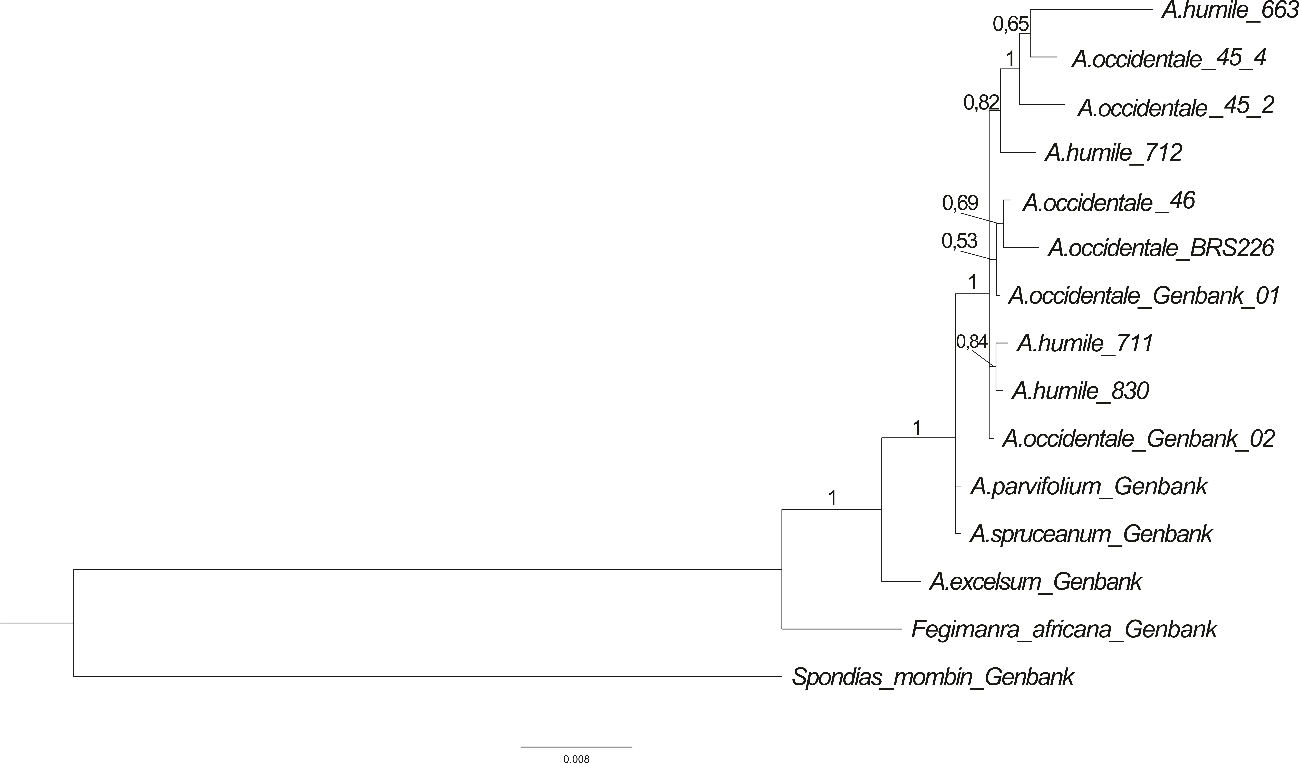
 Figure S6** Bayesian tree of *Anacardium* derived from the analysis of plastidial regions *matK, trnL_trnF*, *rps16*, and *ycf1*, excluding putative hybrids. Posterior probability (PP) values are shown on each branch node


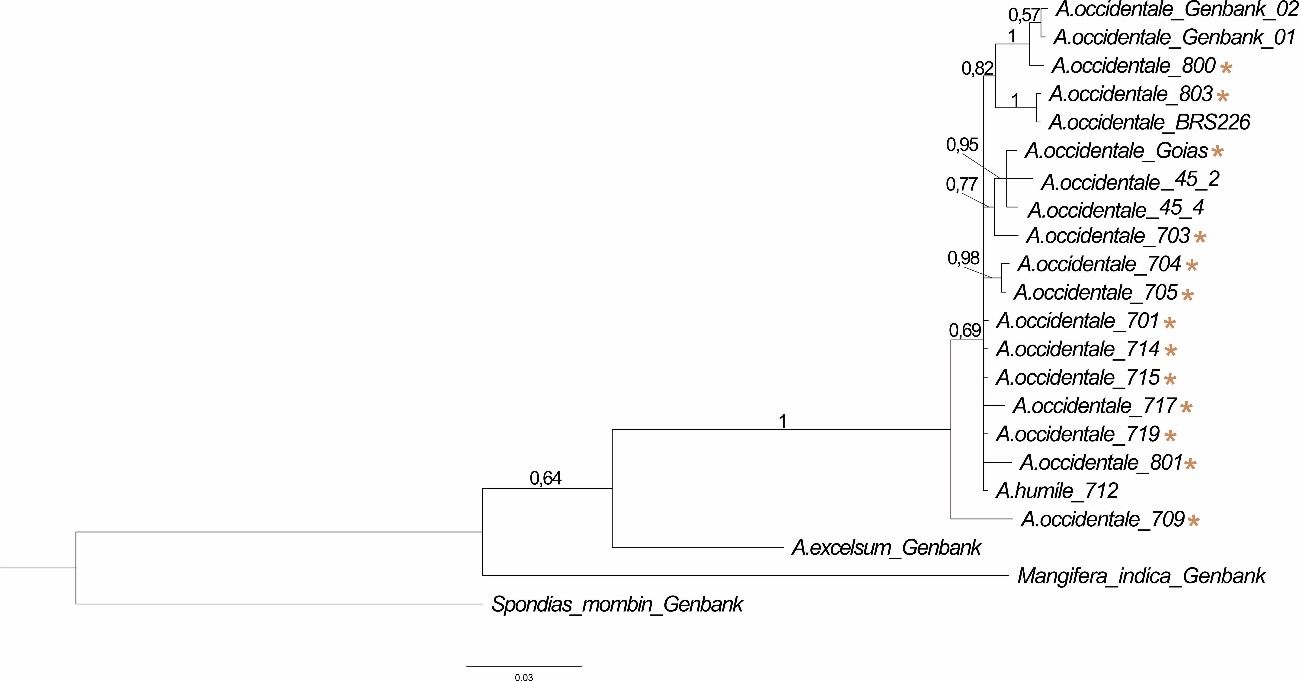


**Figure S7** Bayesian tree of *Anacardium* derived from the analysis of the nuclear *ITS* region. The posterior probability (PP) values are shown for each node, and asterisks indicate tree accessions of *Anacardium occidentale* with cashew-type fruits and cashew apples, i.e., the possible hybrids


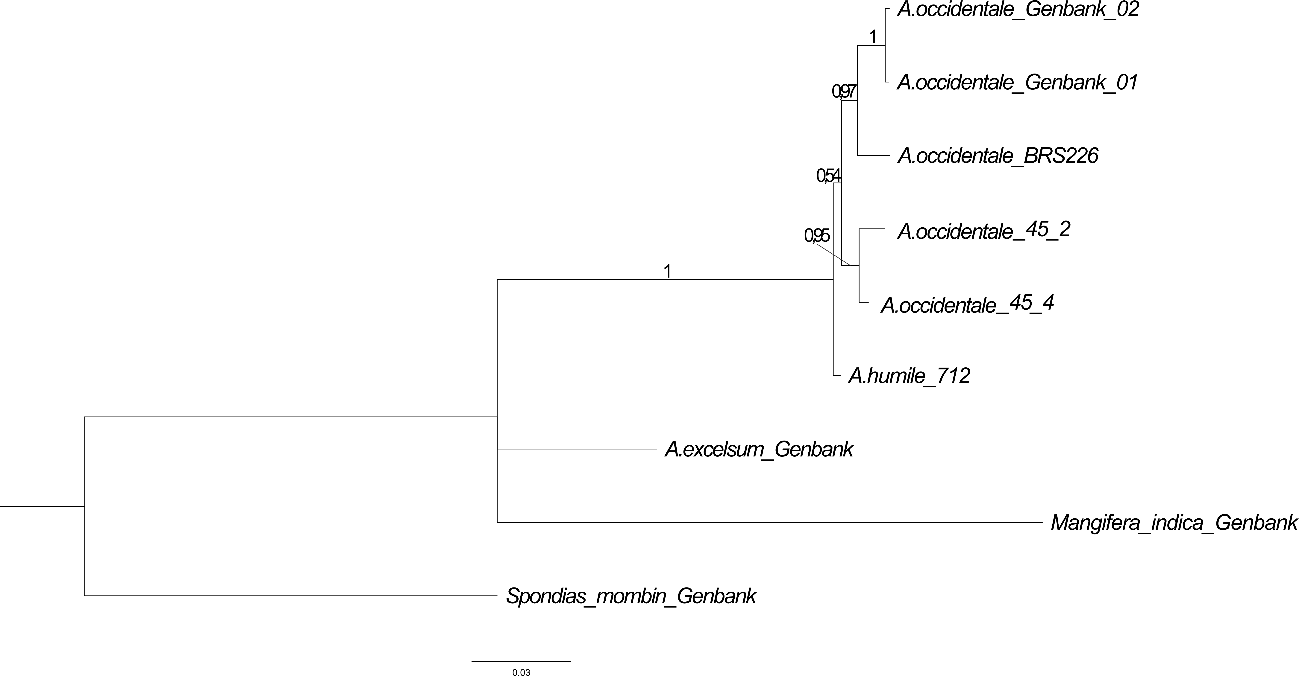


**Figure S8** Bayesian tree of *Anacardium* derived from the analysis of the nuclear *ITS* region, excluding putative hybrids. Posterior probability (PP) values are shown on the branches


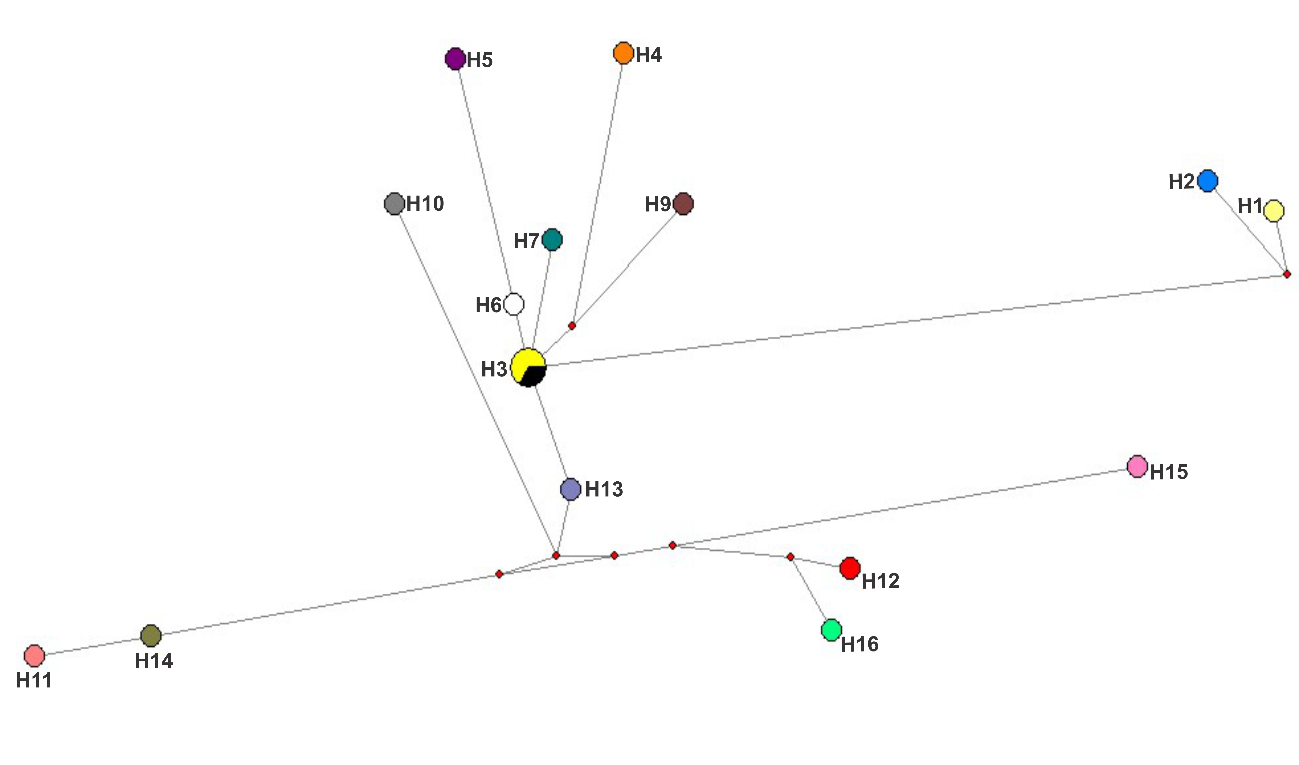


**Figure S9** Haplotype distribution patterns of *A. humile* (H13) and *A. occidentale* (H1-H12 and H14-H16) for nuclear data. The colours in each pie chart correspond to the haplotypes, and the size of the circle represents the proportion of each haplotype

**
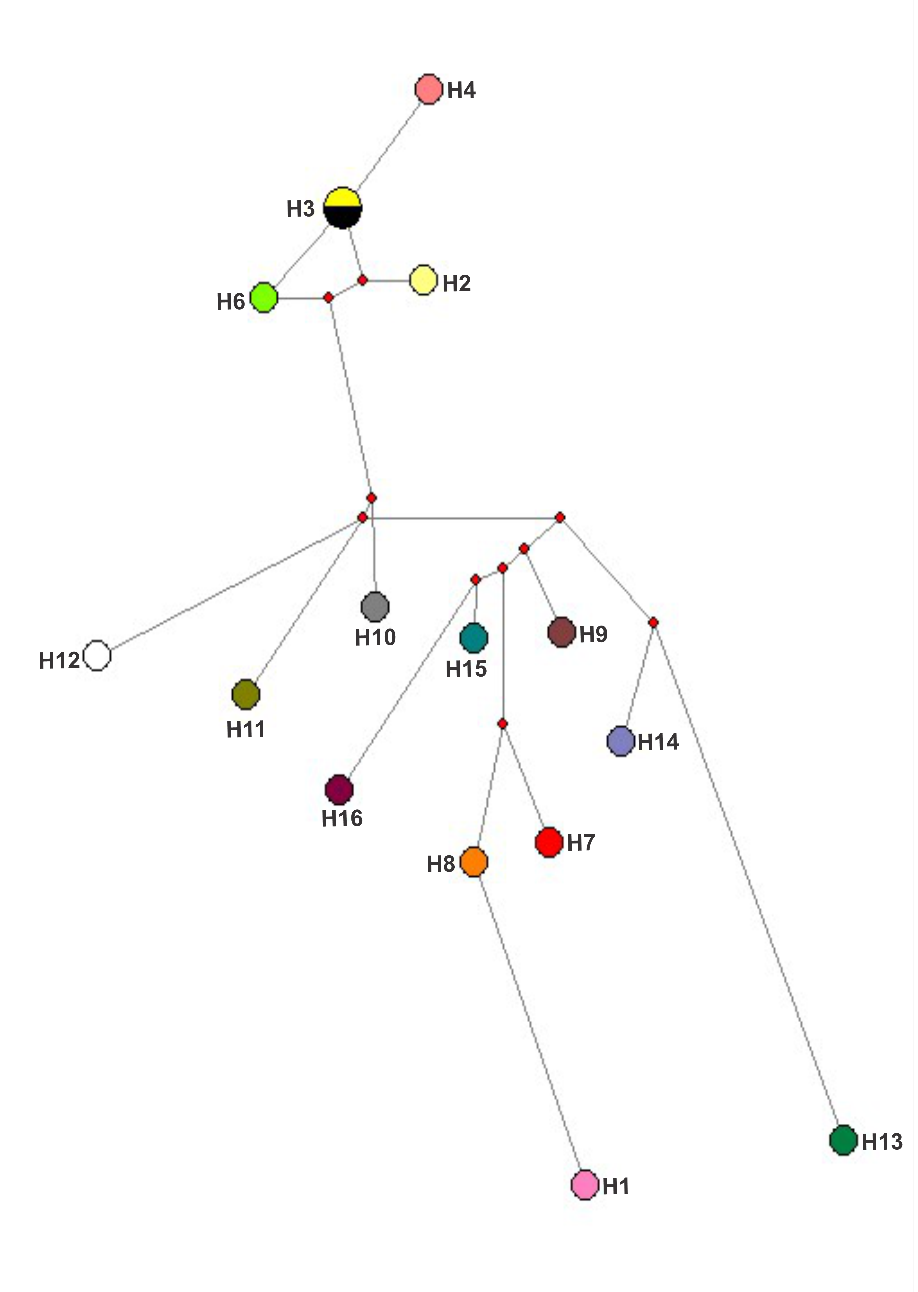
**

**Figure S10** Haplotype distribution patterns of *A. humile* (H10, H11 and H12) and *A. occidentale* (H1-H9 and H13-H16) for plastidial data. The colours in each pie chart correspond to the haplotypes, and the size of the circle represents the proportion of each haplotype
